# Supplementary material for: Herpes Simplex Virus 1 Lytic Infection Blocks MicroRNA (miRNA) Biogenesis at the Stage of Nuclear Export of Pre-miRNAs
Source: PubMed Central journal article supplement (PMC6372804; doi:10.1128/mbio.02856-18), 2019-02-12

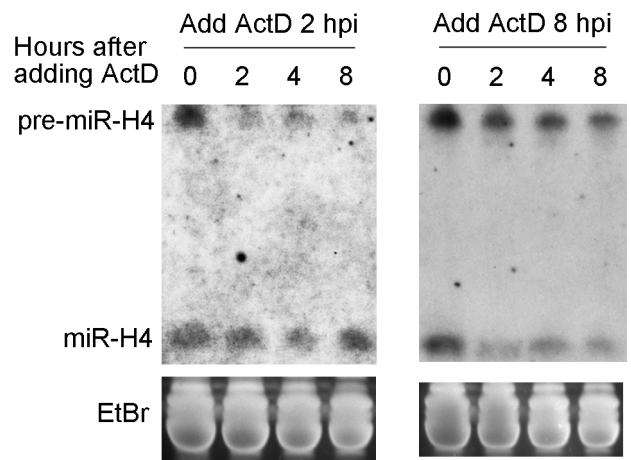

Supplement: mBio.02856-18-sf002.pdf [file mBio.02856-18-sf002.pdf]
